# Supplementary material for: Mitigating triplet loss in 2D WSe2/non-fullerene heterostructures using halogenated acceptors
Source: Royal Society of Chemistry journal article supplement (doi:10.1039/d4mh00894d), 2025-01-01
Supplement: d4mh00894d1.pdf [file d4mh00894d1.pdf]

## SUPPORTING INFORMATION

### Mitigating triplet loss in 2D WSe<sub>2</sub>/non-fullerene heterostructures using halogenated acceptors

Sreelakshmi Chandrabose\*, Ana M. Valencia<sup>+,§</sup>, Meysam Raoufi\*, Nisreen Alshehri<sup>%,£</sup>, Tracey M. Clarke<sup>#</sup>, Frederic Laquai<sup>%,£</sup>, Caterina Cocchi<sup>+,§</sup>, Dieter Neher\*

\* Institute of Physics and Astronomy, University of Potsdam, Karl-Liebknecht-Straße 24/25, 14476, Germany

<sup>+</sup> Carl von Ossietzky Universität Oldenburg, Institute of Physics and Center for Nanoscale Dynamics, 26129 Oldenburg, Germany

<sup>§</sup> Institut für Physik & IRIS Adlershof, Humboldt- Universität zu Berlin, 12489 Berlin, Germany.

<sup>%</sup> KAUST Solar Center, Physical Science and Engineering Division (PSE), Materials Science and Engineering Program (MSE), King Abdullah University of Science and Technology (KAUST), Thuwal 23955-6900, Kingdom of Saudi Arabia.

<sup>#</sup>Department of Chemistry, University College London, London WC1H 0AJ, United Kingdom

<sup>£</sup> Physics and Astronomy Department, College of Sciences, King Saud University, Riyadh 12372, Kingdom of Saudi Arabia

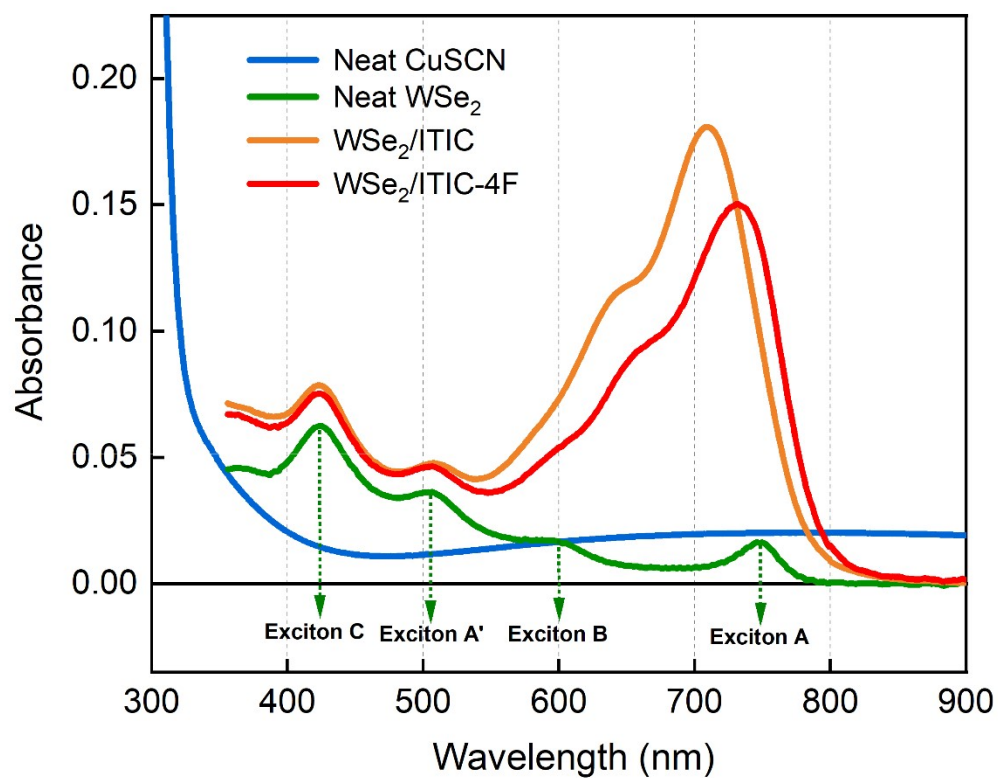

**Figure S1. Steady state absorption spectra.** Steady state optical absorption spectra of donor materials, monolayer WSe<sub>2</sub>, CuSCN (~100 nm) and ML-WSe<sub>2</sub>/NFA bilayers.

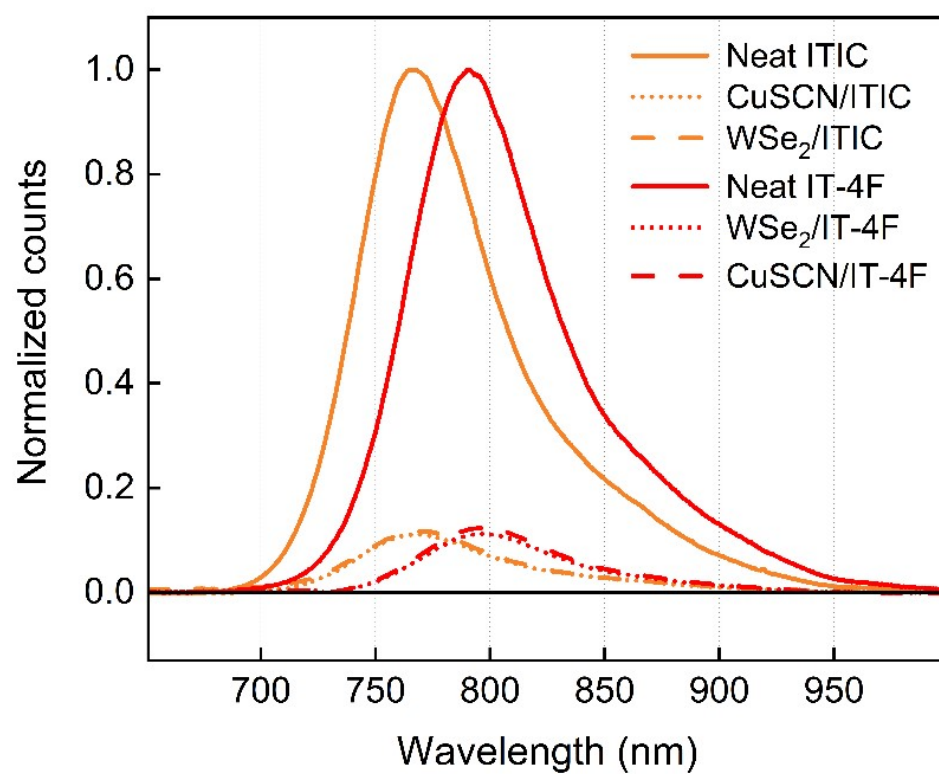

**Figure S2. Photoluminescence quenching in bilayers.** Steady state photoluminescence quenching measurements in various bilayers (CuSCN/ITIC, WSe<sub>2</sub>/ITIC, CuSCN/IT-4F, and WSe<sub>2</sub>/IT-4F).

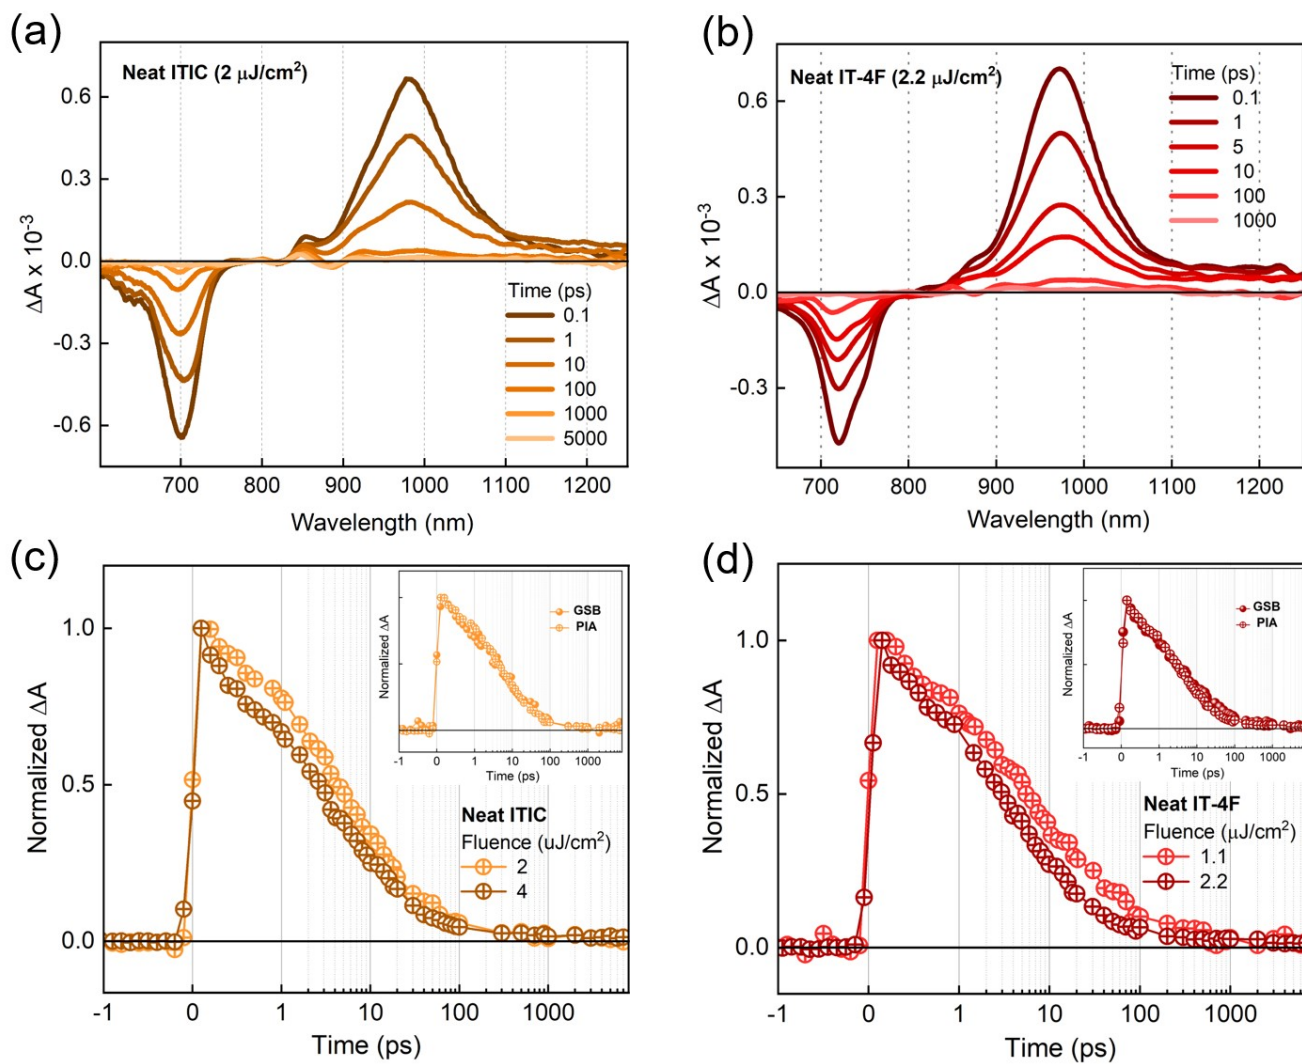

**Figure S3. Transient absorption in neat NFA films.** Series of transient absorption spectra of neat NFAs, (a) ITIC and (b) IT-4F, all excited at a pump wavelength of 700 nm and at fluence of  $\sim 2 \mu\text{J}/\text{cm}^2$ , and fluence dependent exciton dynamics of neat NFAs (c) ITIC and (d) IT-4F. The inset figures show the corresponding dynamics of ground state bleach (GSB) and photoinduced absorption (PIA) features.

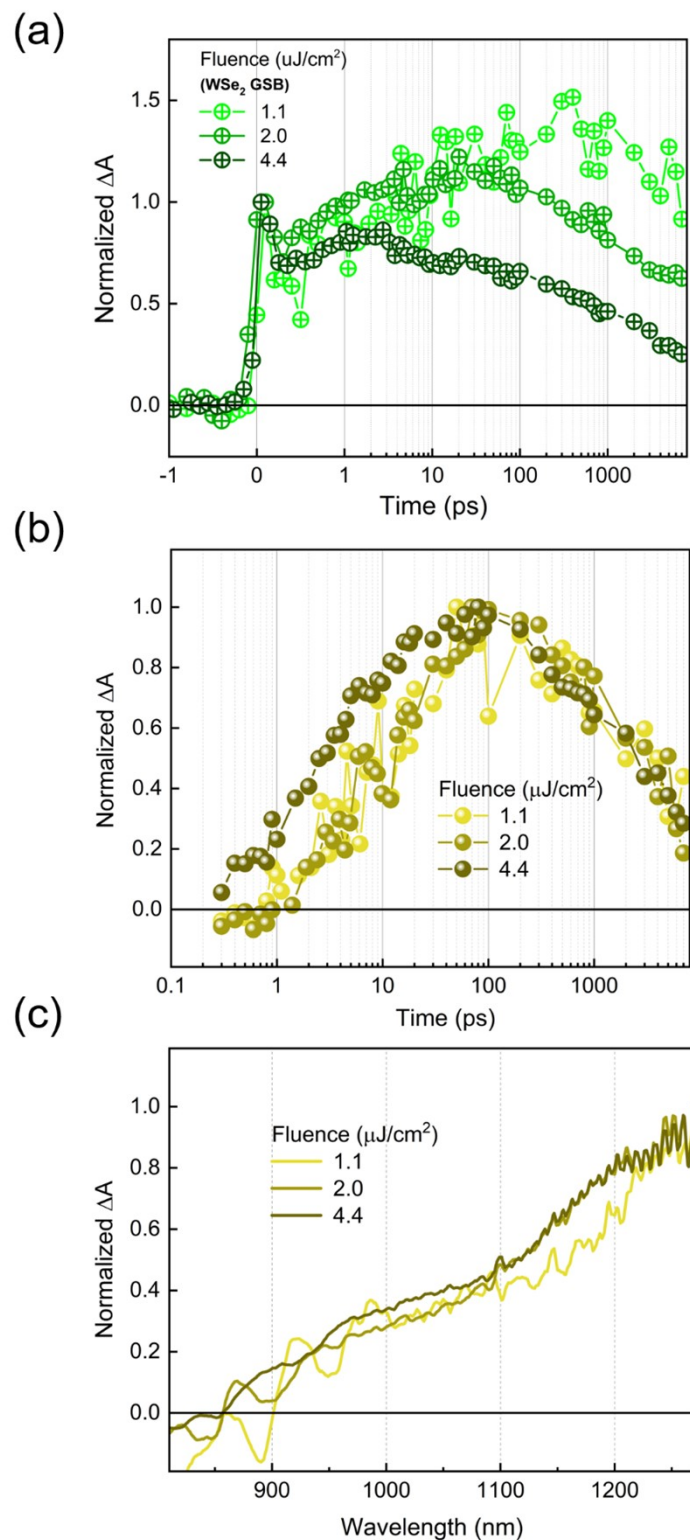

**Figure S4. Formation of triplet excitons from charges.** (a) Fluence dependent kinetics of holes, probed at  $\text{WSe}_2$  hole GSB at 745 nm, (b) fluence dependent kinetics and (c) spectra of triplet excitons obtained after spectral decomposition in the 800-1270 nm region using MCR-ALS algorithm.

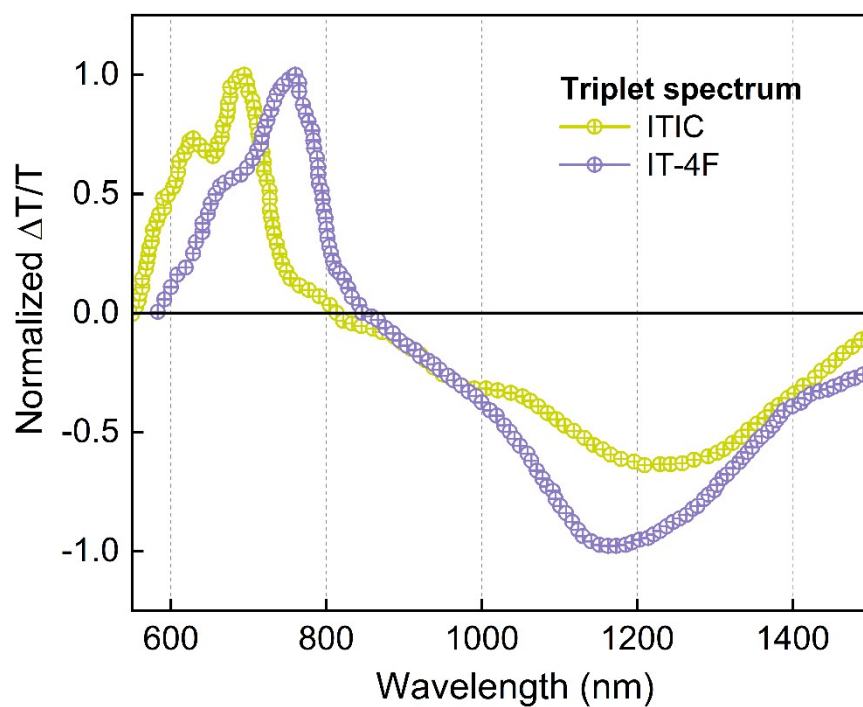

**Figure S5. Triplet sensitization in NFAs.** Normalized triplet spectra of NFAs, measured using steady state photoinduced absorption (PIA) (ITIC) and long delay TAS (IT-4F). The PIA measurements were carried out on heavy metal (PtOEP) doped NFA film after an excitation at 510 nm and at a temperature of 80 K, while long delay TAS measurements were done by exciting the films at 532 nm under vacuum.

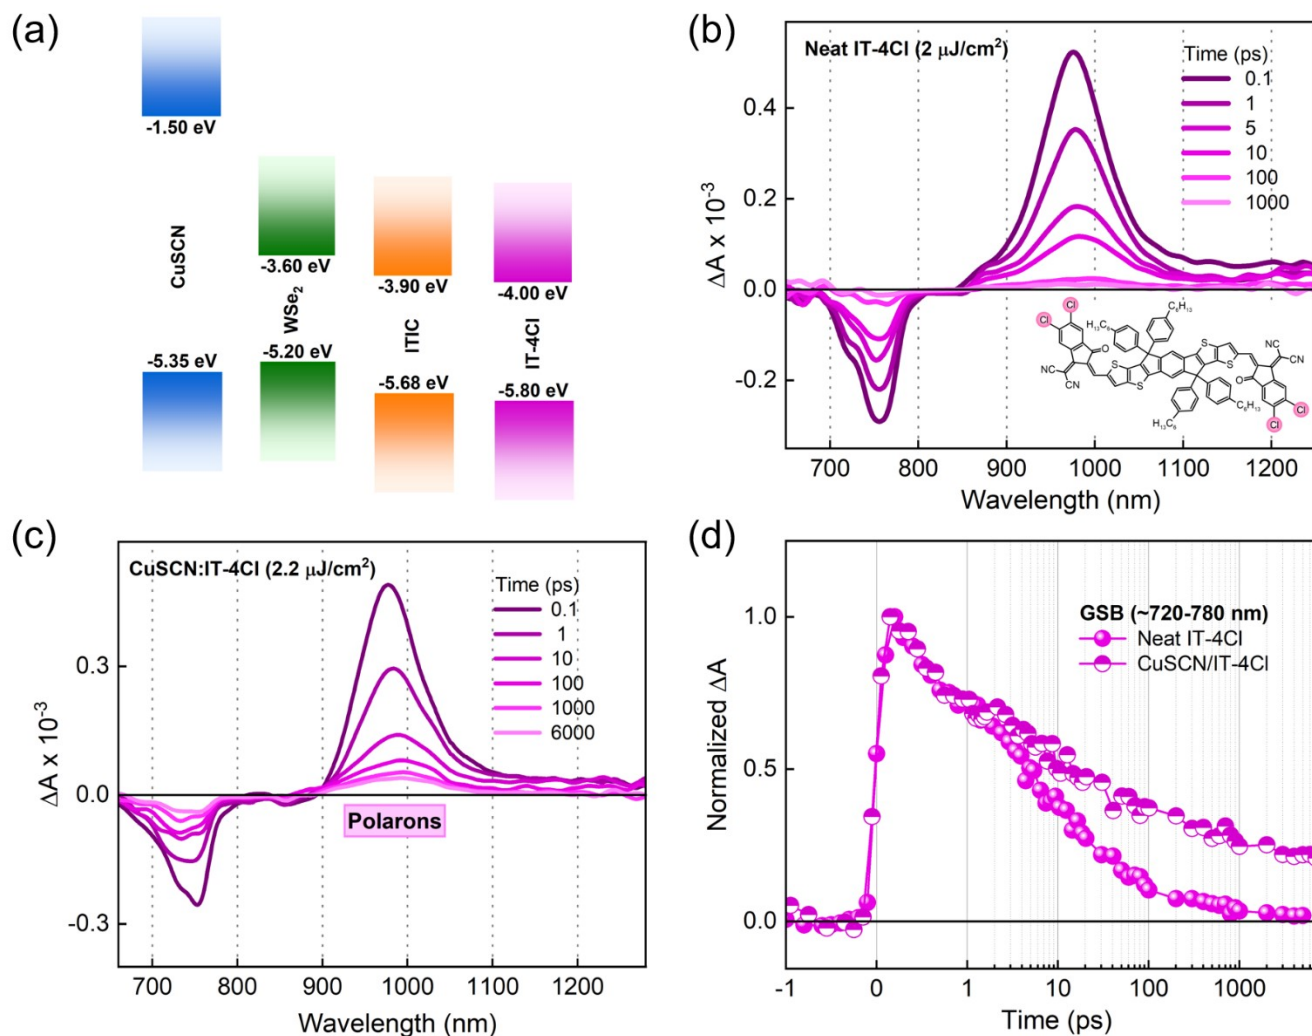

**Figure S6. Charge generation in bilayer with IT-4Cl.** (a) Energy level diagram of donor materials, CuSCN, ML-WSe<sub>2</sub>, and acceptors ITIC and IT-4Cl, series of transient absorption spectra of (b) neat IT-4Cl (molecular structure is shown in the inset) and (c) CuSCN/IT-4Cl, and transient kinetics probed at the GSBs of neat IT-4Cl and CuSCN/IT-4Cl (all excited at 700 nm and at a pump fluence of 2.2  $\mu\text{J}/\text{cm}^2$ .)



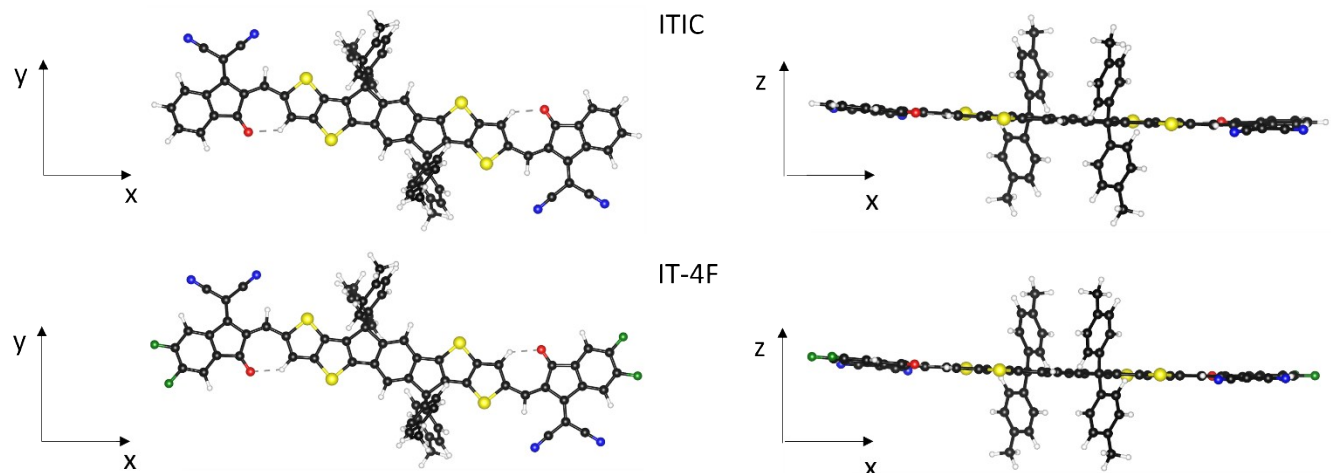

**Figure S7:** Ball-and-stick representation of isolated ITIC molecule (top) and its halogenated counterpart, IT-4F (bottom) relaxed *in vacuo*. C atoms are depicted in dark grey, H atoms in white, F atoms in green, O atoms in red, N atoms in blue, and S atoms in yellow.

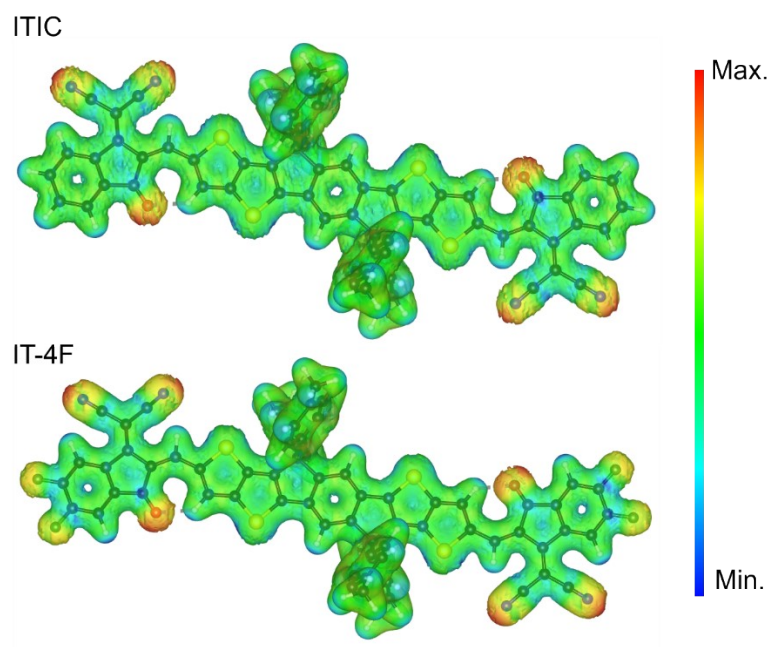

**Figure S8:** Electrostatic potential calculated for ITIC (top) and IT-4F (bottom) in the gas phase.



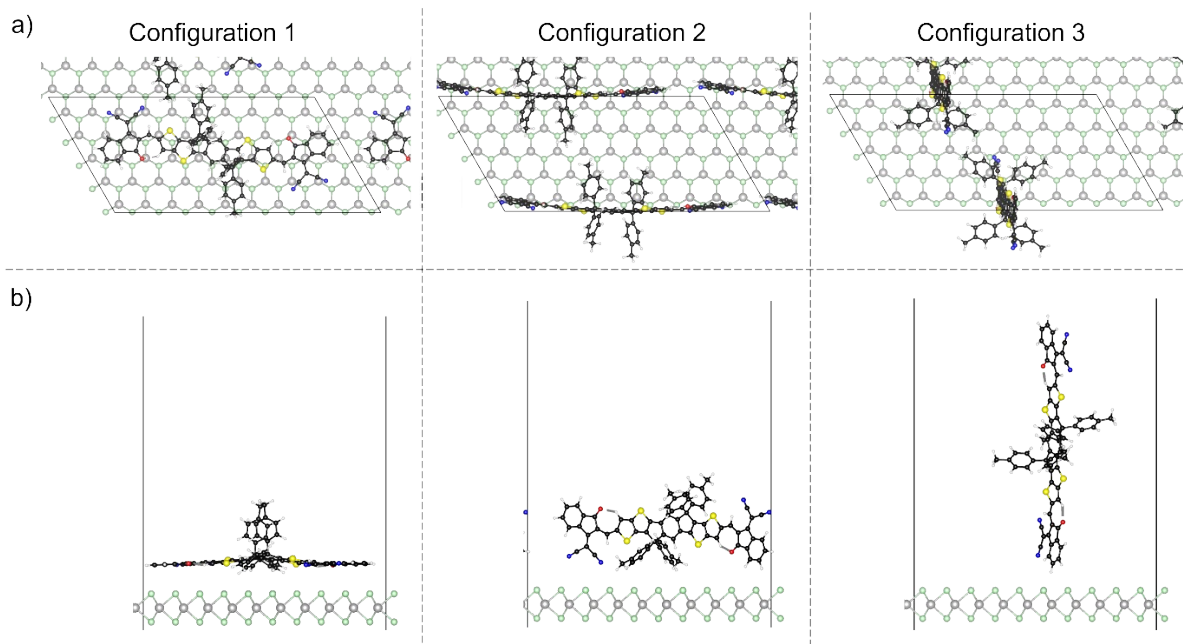

**Figure S9:** a) Top and b) side view of the optimized structures of the hybrid interface formed by ITIC adsorbed on monolayer WSe<sub>2</sub> in three different configurations. The grey continuous lines mark the lateral supercell boundaries. Configuration 1 is the most stable one with a total energy  $E_{\text{tot}} = -29420700, 930$  eV followed by Configuration 2 ( $E_{\text{tot}} = -29420699, 854$  eV) and Configuration 3 ( $E_{\text{tot}} = -29420699, 160$  eV). Based on these results, we focus solely on Configuration 1 in the analysis of the electronic structure.

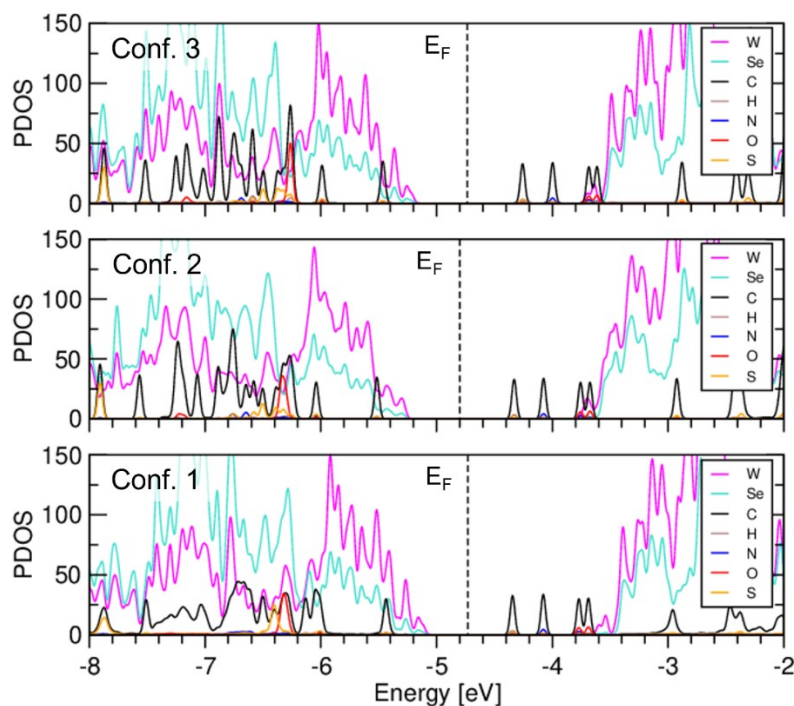

**Figure S10:** Projected density of states (PDOS) of ITIC adsorbed on ML-WSe<sub>2</sub> (10x5) supercell in three different configurations (Fig.S9) calculated with PBE functional. A Gaussian broadening of 20 meV is applied in all plots.

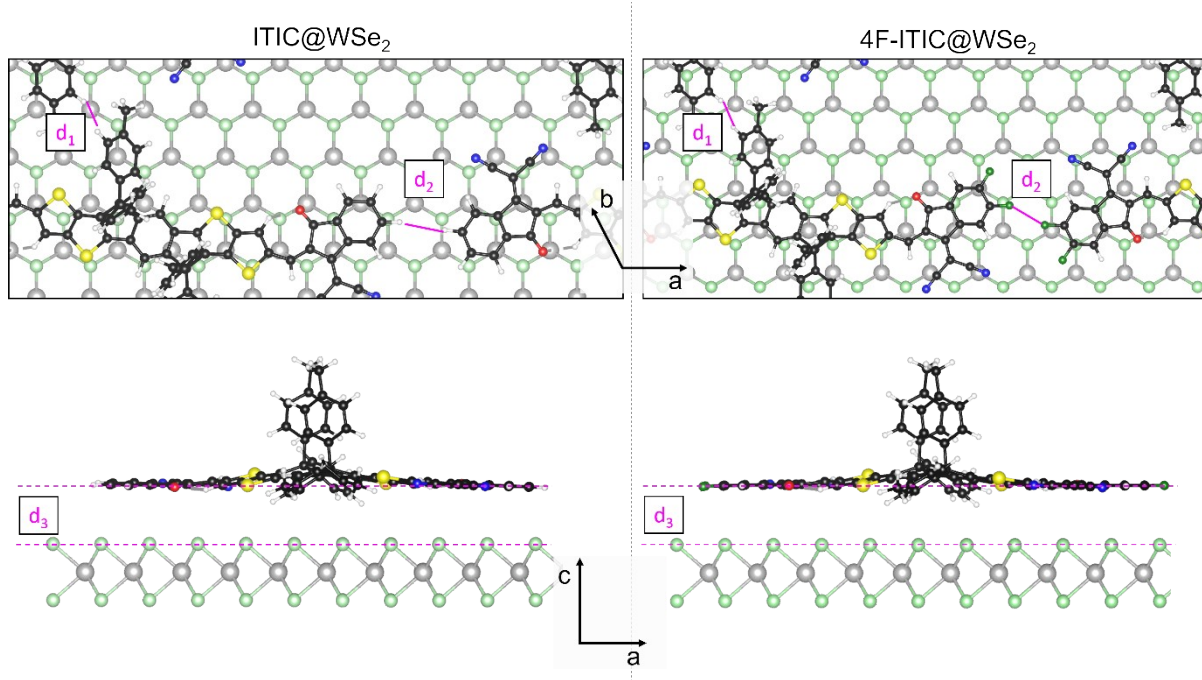

**Figure S11:** Optimized structures of WSe<sub>2</sub>/ITIC (left panel) and WSe<sub>2</sub>/IT-4F (right panel).  $d_1$  is the shortest lateral distance between the H atoms in the aromatic carbon rings (**b**-direction),  $d_2$  is the same distance in the **a**-direction, and  $d_3$  the average distance between the molecule and the Se atoms in WSe<sub>2</sub>.

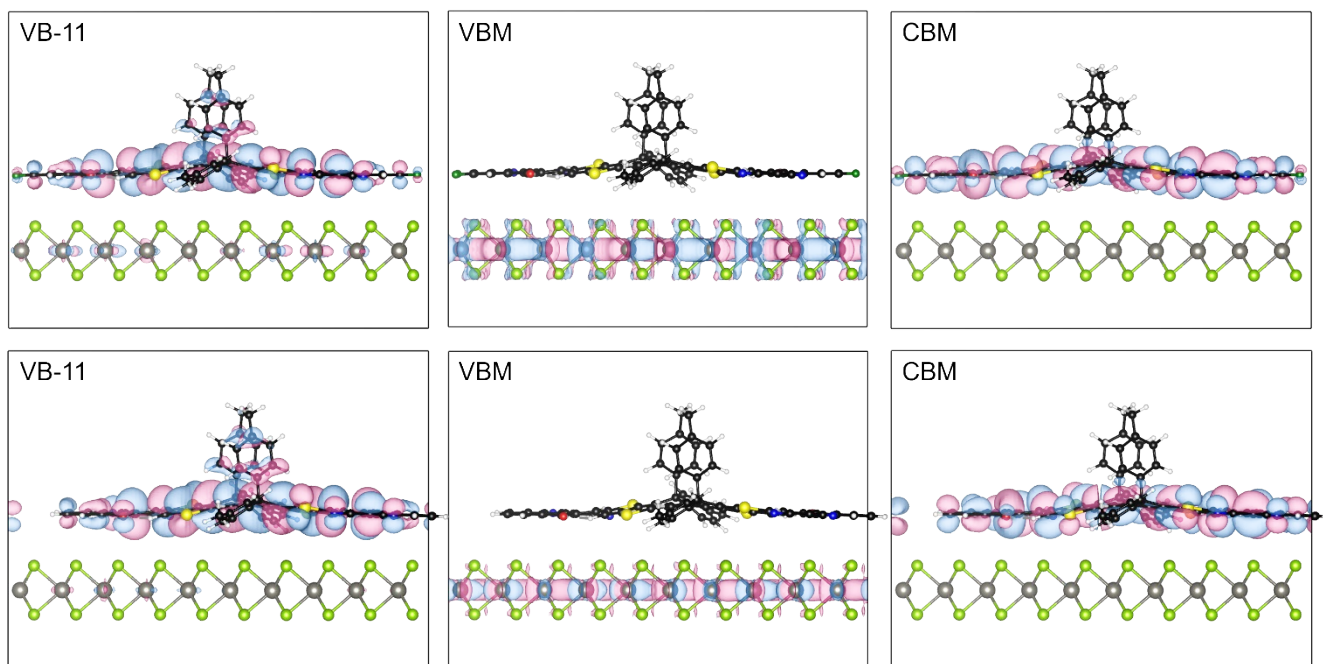

**Figure S12:** Selected electronic states of WSe<sub>2</sub>/IT-4F (upper panels) and WSe<sub>2</sub>/ITIC (lower panels) visualized by their isosurfaces (10% of the maximum value) at the  $\Gamma$ -point. CBM stands for the conduction band minimum and VBM for the valence band maximum.

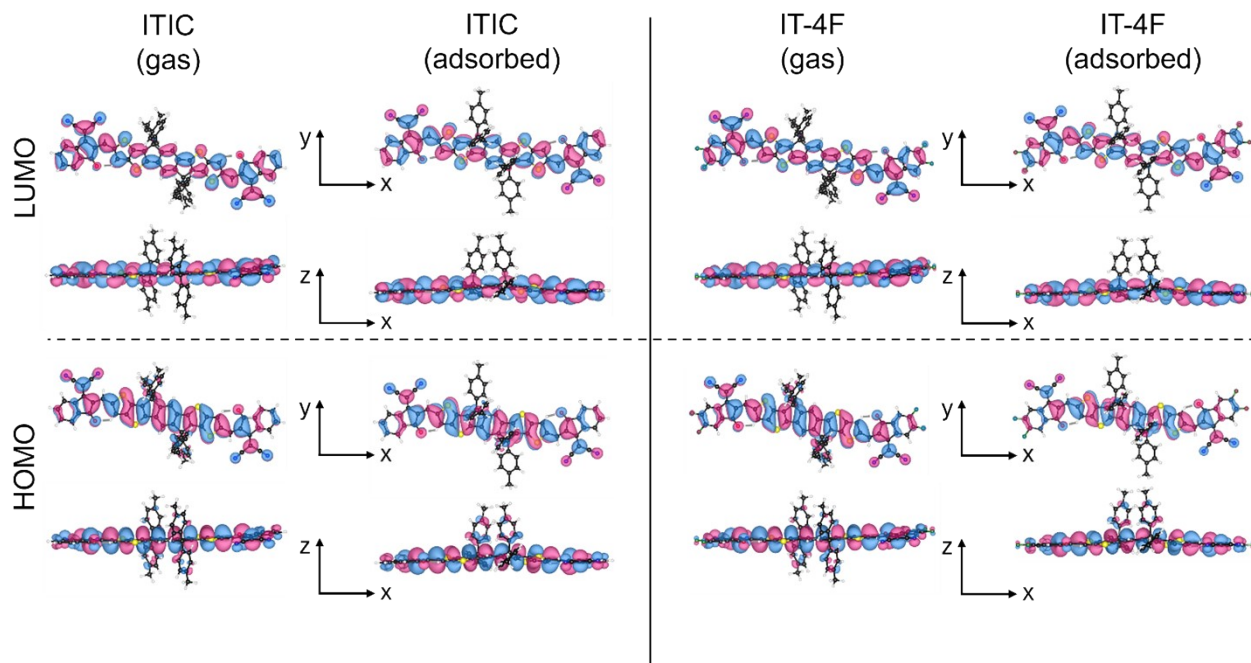

**Figure S13:** Side and top view of the HOMO (highest occupied molecular orbital) and the LUMO (lowest occupied molecular orbital). ITIC (left panels) and IT-4F (right panels) visualized by their isosurfaces (10% of the maximum value). In the gas-phase molecules in their optimized geometries and constrained in the geometry they assumed upon adsorption on  $\text{WSe}_2$  (adsorbed).

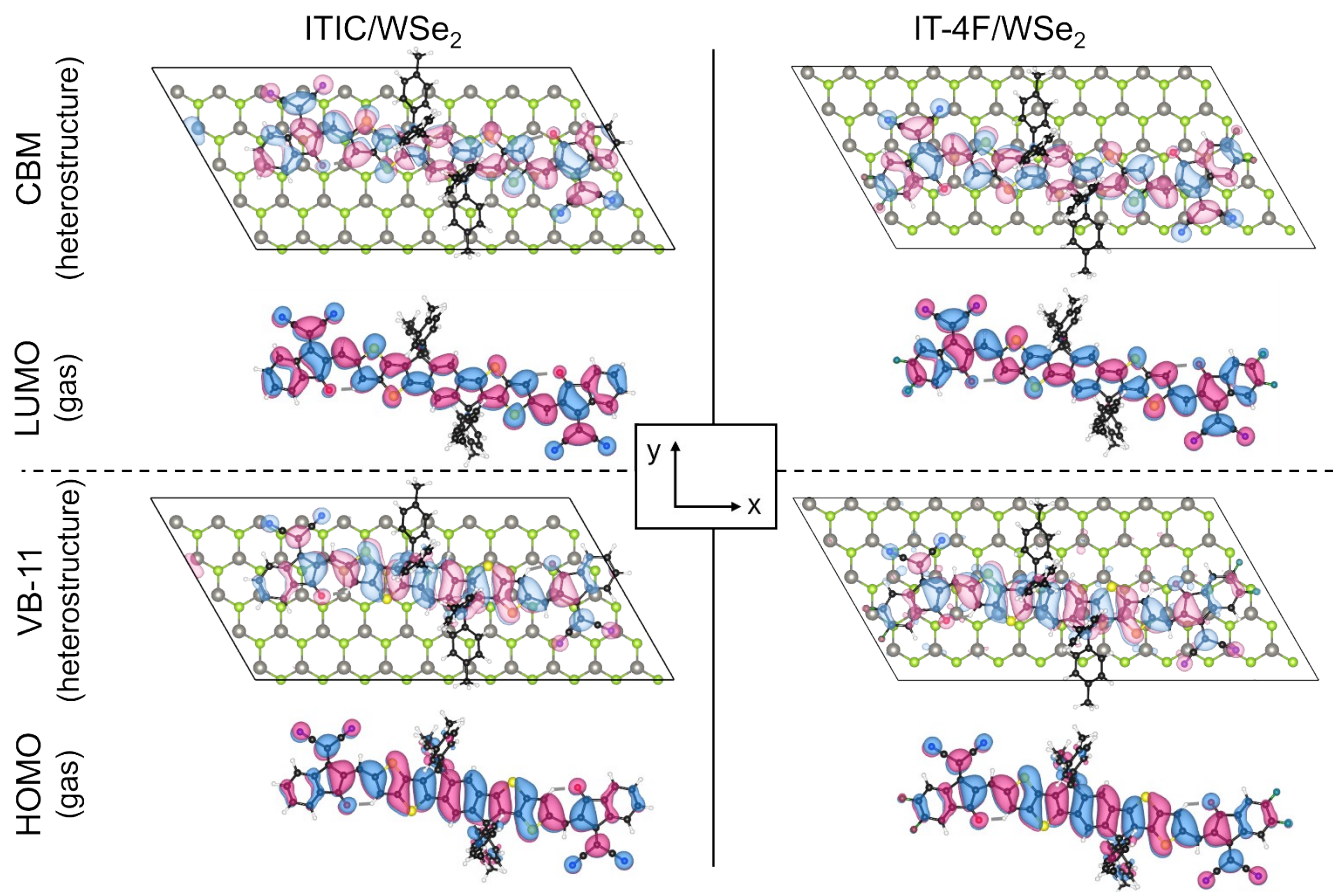

**Figure S14:** Top view of the HOMO (VB-11) and the LUMO (CBM) of NFA in gas-phase (heterostructure). Left panel ITIC and ITIC/WSe<sub>2</sub> and right panel IT-4F and ITIC/WSe<sub>2</sub> visualized by their isosurfaces (10% of the maximum value).

| Non-fullerene acceptor (NFA) | Absorption coefficients ( $10^5 \text{ cm}^{-1}$ ) | Monomolecular lifetime (ps) | Exciton diffusion length (nm) |
|------------------------------|----------------------------------------------------|-----------------------------|-------------------------------|
| ITIC                         | 1.10                                               | 394                         | 31.9                          |
| IT-4F                        | 1.16                                               | 351                         | 47.4                          |

**Table S1.** Summary of selection parameters of NFAs. Absorption coefficients, monomolecular exciton lifetimes and exciton diffusion lengths of NFAs, ITIC and IT-4F<sup>[1][2][3]</sup>.

|                         | $d_1$ | $d_2$ | $d_3$ |
|-------------------------|-------|-------|-------|
| WSe <sub>2</sub> /ITIC  | 2.08  | 2.84  | 3.5   |
| WSe <sub>2</sub> /4F-IT | 2.05  | 2.76  | 3.5   |

**Table S2:** Lateral ( $d_1$  and  $d_2$ ) and vertical distance ( $d_3$ ) between the molecule and the monolayer in the considered hybrid heterostructures see **Figure S10**. All values are given in Å.

|                       | ITIC@WSe <sub>2</sub> | ITIC (adsorbed) | ITIC (gas-phase) | IT-4F@WSe <sub>2</sub> | IT-4F (adsorbed) | IT-4F (gas-phase) |
|-----------------------|-----------------------|-----------------|------------------|------------------------|------------------|-------------------|
| HOMO [eV]             | -5.30                 | -5.59           | -5.61            | -5.34                  | -5.74            | -5.76             |
| LUMO [eV]             | -4.25                 | -4.00           | -3.94            | -4.34                  | -4.17            | -4.12             |
| $E_{\text{gap}}$ [eV] | 1.05                  | 1.59            | 1.67             | 1.00                   | 1.57             | 1.64              |
| Dipole moment [Debye] |                       | 3.76            | 0.79             |                        | 3.80             | 0.26              |

**Table S3:** Frontier energy values and energy gap ( $E_{\text{gap}}$ ) computed from DFT (HSE06+SOC functional) for the hybrid interfaces and the gas-phase molecules in their optimized geometries and constrained in the geometry they assumed upon adsorption on WSe<sub>2</sub> (adsorbed).

| NFAs  | $E_{S1}$ | $E_{T1}$ | $\Delta E_{ST} = E_{S1} - E_{T1}$ |
|-------|----------|----------|-----------------------------------|
| ITIC  | 1.85 eV  | 1.22 eV  | 0.63 eV                           |
| IT-4F | 1.82 eV  | 1.21 eV  | 0.61 eV                           |

**Table S4:** Results obtained within the density functional theory (DFT) and time-dependent DFT (TDDFT) framework to study the optical properties of NFAs molecules. All TDDFT calculations are performed using the Gaussian 16 package<sup>[4]</sup>. We used the Becke three-parameter Lee–Yang–Parr (B3LYP)<sup>[5]</sup> and Gaussian-type cc-pVTZ basis set<sup>[6]</sup>.  $E_{S1}$  is the first singlet excitation,  $E_{T1}$  is the first triplet excitation, and  $\Delta E_{ST}$  is the energy difference between  $T_1$  and  $S_1$  states.

## REFERENCES

- [1] H. Zhang, H. Yao, J. Hou, J. Zhu, J. Zhang, W. Li, R. Yu, B. Gao, S. Zhang, J. Hou, *Advanced Materials* **2018**, 30, 1.
- [2] W. Zhao, S. Li, H. Yao, S. Zhang, Y. Zhang, B. Yang, J. Hou, *J Am Chem Soc* **2017**, 139, 7148.
- [3] Y. Firdaus, V. M. Le Corre, S. Karuthedath, W. Liu, A. Markina, W. Huang, S. Chattopadhyay, M. M. Nahid, M. I. Nugraha, Y. Lin, A. Seitkhan, A. Basu, W. Zhang, I. McCulloch, H. Ade, J. Labram, F. Laquai, D. Andrienko, L. J. A. Koster, T. D. Anthopoulos, *Nat Commun* **2020**, 11, DOI 10.1038/s41467-020-19029-9.
- [4] M. J. Frisch, et al. Gaussian 16 Rev. C.01 **2016**.
- [5] A. D. Becke, *J Chem Phys* **1993**, 98, 5648.
- [6] D. E. Woon, T. H. Dunning, *J Chem Phys* **1993**, 98, 1358.
